# Supplementary material
Source: publisher figshare collection journal article supplement (https://tandf.figshare.com/articles/dataset/_/7792436)
Supplement: Supplementary file 1 [file 2]

Archive with 2 entries (2 files):
- tjom_a_1576553_sm5868.pdf
- tjom_a_1576553_sm5798.pdf
