# Supplementary material
Source: publisher figshare collection journal article supplement (https://tandf.figshare.com/articles/dataset/_/7792436)
Supplement: Supplementary file 1 [file 2 › tjom_a_1576553_sm5798.pdf]

## ENCUESTA TORTILLERAS

FECHA \_\_\_\_\_ ENCUESTADORA \_\_\_\_\_ NÚMERO \_\_\_\_\_

**I. SECCION GENERAL SOCIO-ECONÓMICA**

1. Nombre y Apellido de la Sra. \_\_\_\_\_
2. Nombre de la Comunidad \_\_\_\_\_
3. Dirección \_\_\_\_\_
4. Estado civil \_\_\_\_\_
5. ¿Cuántas personas viven en su casa? \_\_\_\_\_
6. ¿Vive con su esposo o compañero? (Sí/No) \_\_\_\_\_
7. ¿Cuántos dependen de su trabajo –venta tortillas- (hijos, hijas, nietos, u otros familiares) \_\_\_\_\_
8. ¿En qué trabaja su esposo? \_\_\_\_\_
9. ¿Ha migrado su esposo USA? (Sí/No) \_\_\_\_\_
10. ¿Cuántos años en total? \_\_\_\_\_ ¿meses al año? \_\_\_\_\_
11. Número de migrantes a USA en la casa \_\_\_\_\_
12. ¿Le ayuda su esposo con el gasto? (Sí/No) \_\_\_\_\_
13. ¿Le ayudan otros familiares con el gasto? (Sí/No) \_\_\_\_\_
14. ¿Le ayuda su esposo a recolectar leña? (Sí/No) \_\_\_\_\_
15. ¿Otra persona qué le ayuda a cortar leña? \_\_\_\_\_
16. ¿Cuántos años lleva haciendo tortillas? \_\_\_\_\_
17. ¿Le gusta hacer tortillas? (Sí/No) \_\_\_\_\_
18. OBSERVACIONES ALGÚN COMENTARIO \_\_\_\_\_
19. ¿Se siente cansada? (Sí/No) \_\_\_\_\_
20. ¿Por qué empezó a hacer tortillas para la venta? \_\_\_\_\_
21. ¿Su madre también era tortillera? (Sí/No) \_\_\_\_\_
22. ¿Su abuela? (Sí/No) \_\_\_\_\_
23. ¿Quién le enseñó hacer tortillas? \_\_\_\_\_
24. ¿Dónde la vende? \_\_\_\_\_
25. ¿Cómo consiguió sitio para vender en el mercado? \_\_\_\_\_
26. ¿Alguien de su familia va a continuar su trabajo? (Sí/No) \_\_\_\_\_
27. ¿Qué maíz prefiere para las tortillas de su casa? \_\_\_\_\_
28. ¿Por qué? \_\_\_\_\_
29. ¿Qué maíz prefiere para las tortillas que hace para vender? \_\_\_\_\_
30. ¿Por qué? \_\_\_\_\_

OBSERVACIONES (apuntar el estado de la señora salud –tose, flemas-, vivienda, cocina, aspecto físico algún comentario sobre su vida como tortillera y sobre el maíz que le gusta a los clientes)

---



---



---



---

## **II. CONSUMO DE TORTILLA EN CASA**

31. ¿Hace usted todas las tortillas en esta casa? Sí \_\_\_\_ No \_\_\_\_

32. ¿Quién ayuda a hacer las tortillas en la casa? \_\_\_\_\_

33. ¿Cuántas docenas de tortillas comen al día? \_\_\_\_\_

## **III. TORTILLAS PARA VENDER**

34. ¿Desde cuándo hace tortillas para vender? \_\_\_\_\_

35. ¿Quiénes le ayudan a hacer tortillas? \_\_\_\_\_

36. ¿Los días de venta hace cuántas? (docenas) \_\_\_\_\_ (Litros o cuarterones) \_\_\_\_\_

37. ¿Cuántos días hace para vender a la semana? \_\_\_\_\_

## **IV SECCIÓN MAÍZ**

38. ¿Participa usted en las labores agrícolas? Sí \_\_\_\_ No \_\_\_\_

39. ¿Qué hace usted y cuánto tiempo le dedica?

| Actividad               | Sí | No | Jornales (#) | Horas (#) |
|-------------------------|----|----|--------------|-----------|
| Siembra                 |    |    |              |           |
| Escarda                 |    |    |              |           |
| Deshierbe               |    |    |              |           |
| Recoger quelites        |    |    |              |           |
| Cosecha maíz            |    |    |              |           |
| Cosecha de otro cultivo |    |    |              |           |
| Selección de semilla    |    |    |              |           |
| Desgrane                |    |    |              |           |
| Llevar comida           |    |    |              |           |
| Otra                    |    |    |              |           |
|                         |    |    |              |           |

40. ¿Cuántas hectáreas **totales** siembran de maíz? \_\_\_\_\_

15. ¿Qué variedades?

|                                                                | Color de maíz |      |       |      |      |
|----------------------------------------------------------------|---------------|------|-------|------|------|
|                                                                | Blanco        | Rojo | Negro | Otro | Otro |
| Anegas o kg o costales cosechadas (#)                          |               |      |       |      |      |
| TOTAL                                                          |               |      |       |      |      |
| Superficie (hectáreas)                                         |               |      |       |      |      |
| TOTAL (hectáreas)                                              |               |      |       |      |      |
| ¿Para qué lo utiliza?<br>(pozole, tamales, huchepos, corundas) |               |      |       |      |      |
| ¿Por qué lo prefiere?                                          |               |      |       |      |      |

16. ¿Hasta qué mes usa maíz propio para hacer tortillas? \_\_\_\_\_
17. ¿Le alcanza el maíz hasta la siguiente cosecha? Sí \_\_\_ No \_\_\_
18. ¿Compra maíz? Sí \_\_\_ No \_\_\_
19. ¿Cuántos meses al año \_\_\_\_\_?
20. ¿Cuánto maíz criollo compra al día \_\_\_\_\_ y por semana \_\_\_\_\_?
- 22a. ¿Dónde lo compra? \_\_\_\_\_
21. ¿Cuánto maíz híbrido compra al día \_\_\_\_\_ y por semana \_\_\_\_\_?
- 22b. ¿Dónde lo compra? \_\_\_\_\_
23. ¿Mezcla el maíz que compra con el propio? Sí \_\_\_ No \_\_\_
24. ¿Por qué mezcla el maíz comprado? \_\_\_\_\_
25. Proporción maíz propio maíz comprado (MEDIDA DE LITRO Y PESAR MAÍZ)\*\*
- ¿Cuántos cuarterones o litros \_\_\_\_\_ Cuántos kg de maíz propio? \_\_\_\_\_
- ¿Cuántos cuarterones o litros \_\_\_\_\_ Cuántos kg de maíz comprado \_\_\_\_\_

## V. SECCIÓN ELABORACIÓN TORTILLAS (tiempo, leña y \$\$)

26. Horas invertidas en la elaboración de tortillas y venta

| Actividad                 | Horas (#) |
|---------------------------|-----------|
| Nixtamal                  |           |
| Molino                    |           |
| Tortillas casa            |           |
| Tortillas venta           |           |
| Transporte (ida y vuelta) |           |
| Venta                     |           |
| Otros                     |           |
| TOTAL horas               |           |

27. Elaboración de tortillas (poner una X)

| Tortillas          | A mano | Con prensa |
|--------------------|--------|------------|
| Para comer en casa |        |            |
| Para venta         |        |            |

28. ¿Cuántos días hace tortillas a la semana? \_\_\_\_\_
29. ¿Cuántas tortillas vende por día de venta?  
(#docenas) \_\_\_\_\_ (kg) \_\_\_\_\_
30. ¿Cuánto gastan (efectivo) al día de venta de tortillas? \_\_\_\_\_
31. ¿Cuánto ganan por día de venta de tortillas? \_\_\_\_\_
32. ¿Dónde venden las tortillas? (insistir) \_\_\_\_\_
33. ¿Antes vendía más tortillas que ahora? 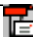 Sí \_\_\_ No \_\_\_\_\_
34. ¿Ahora es más difícil venderlas que antes? Sí \_\_\_ No \_\_\_\_\_ Igual \_\_\_\_\_
35. Costos y beneficios económicos de la venta de tortillas diaria.

| Rubro | Cantidad | Pesos (\$) | Observaciones: |
|-------|----------|------------|----------------|
|-------|----------|------------|----------------|

|                            |  |  |  |
|----------------------------|--|--|--|
| <b>COSTOS DÍA</b>          |  |  |  |
| Maíz propio blanco (kg)    |  |  |  |
| Maíz propio color (kg)     |  |  |  |
| Maíz comprado criollo (kg) |  |  |  |
| Maíz comprado híbrido (kg) |  |  |  |
| Molino (\$)                |  |  |  |
| Leña (\$)                  |  |  |  |
| Cal (g)                    |  |  |  |
| Transporte (\$)            |  |  |  |
| Bolsas (\$)                |  |  |  |
| <b>Gasto diario (\$)</b>   |  |  |  |
|                            |  |  |  |
| <b>GANANCIAS DÍA</b>       |  |  |  |
| Docenas tortillas/día (#)  |  |  |  |
| Precio tortilla (docena)   |  |  |  |
| Precio por kg              |  |  |  |
| Ganancia por día (\$)      |  |  |  |
| Ganancia por semana (\$)   |  |  |  |
|                            |  |  |  |

Días de venta a la semana (#) \_\_\_\_\_

Docenas tortillas producidas a la venta diaria (#) \_\_\_\_\_

Leña empleada por día (kg) \_\_\_\_\_

Leña empleada por semana (kg) \_\_\_\_\_

36. ¿Estaría interesada de vender a otros compradores si le pagan más? Sí \_\_\_ No \_\_\_

37. ¿Estaría interesada de vender si le compran la tortilla en su casa? Sí \_\_\_ No \_\_\_

38. ¿Ha pensado en unirse con otras vendedoras de tortillas? Sí \_\_\_ No \_\_\_

## **VI. LEÑA**

39. ¿Cómo obtiene la leña que usan en casa?

40. Compra \_\_\_\_\_ Recolectada \_\_\_\_\_ Compra y  
Recolectada \_\_\_\_\_

## **RECOLECTA**

41. ¿Quién recolecta? \_\_\_\_\_

42. ¿De dónde la trae? \_\_\_\_\_

43. ¿Cuánta leña trae? \_\_\_\_\_ cargas (espalda, bestia, camioneta, )

44. ¿Cuánto tiempo le dura? \_\_\_\_\_

45. ¿Si la vende a cuánto se la pagan? \_\_\_\_\_

## **COMPRAN LA LEÑA**

46. ¿A quién le compran? \_\_\_\_\_

47. Compra la leña por :

Carga \_\_\_\_\_ camionetada \_\_\_\_\_ Brazada \_\_\_\_\_ leño \_\_\_\_\_ Burrada \_\_\_\_\_ otro \_\_\_\_\_

48. ¿Cuántos días le dura lo que compra? \_\_\_\_\_

49. ¿Cuánto cuesta la :  
Carga \_\_\_\_\_ camionetada \_\_\_\_\_ Brazada \_\_\_\_\_ leño \_\_\_\_\_ Burrada \_\_\_\_\_ otro \_\_\_\_\_
50. Si es carga de burro o caballo ¿cuántos leños tiene? \_\_\_\_\_
51. Si es camioneta grande o chica ¿cuántas cargas trae? \_\_\_\_\_
52. ¿Qué tipo de leña le gusta usar más?  
Pino \_\_\_\_\_ Encino \_\_\_\_\_ Madroño \_\_\_\_\_ Desperdicio de aserradero \_\_\_\_\_ Barañas \_\_\_\_\_ Otro \_\_\_\_\_
53. ¿Qué tipo de leña usa más?  
Pino \_\_\_\_\_ Encino \_\_\_\_\_ Madroño \_\_\_\_\_ Desperdicio de aserradero \_\_\_\_\_ Barañas \_\_\_\_\_ Otro \_\_\_\_\_
54. ¿Es difícil conseguir la leña? Sí \_\_\_\_\_ No \_\_\_\_\_
55. ¿Por qué? \_\_\_\_\_
56. ¿Cree usted que gasta más dinero en leña ahora que hace 5 años? \_\_\_\_\_

***PEDIR QUE MUESTRE LA LEÑA QUE USA EN UN DIA PARA HACER TORTILLAS***

56. Peso de la leña por día \_\_\_\_\_ kg

Comprobar el estado de la leña: Seca ( ) Húmeda ( )

**CONSUMO DE LEÑA**

|       | Peso inicial (kg) (A) | No de leños | Peso final (kg) (B) | No de leños | Consumo (A-B) | Condiciones del combustible |        | Comentarios |
|-------|-----------------------|-------------|---------------------|-------------|---------------|-----------------------------|--------|-------------|
| Día 1 |                       |             |                     |             |               | Seco                        | Húmedo |             |
| Día 2 |                       |             |                     |             |               | Seco                        | Húmedo |             |
|       |                       |             |                     |             |               | Seco                        | Húmedo |             |

**VII. SECCIÓN FOGÓN SACAR FOTOS FOGONES, SEÑORAS Y MAÍZ!!!!**

57. Dibujar o describir el fogón que usa para hacer tortillas (atrás de la hoja)
58. Usa el mismo fogón para cocer el nixtamal? Sí \_\_\_\_\_ No \_\_\_\_\_
60. \_\_\_\_\_
59. ¿Donde cocina los alimentos de su casa? (Si es otro fogón, también dibujarlo) \_\_\_\_\_
60. ¿A que hora cuece el nixtamal? \_\_\_\_\_

**VIII. SECCIÓN SALUD**

61. ¿Usted cree que hacer tortillas le perjudique a su salud?
62. ¿Qué malestares siente?:
63. Dolor de huesos \_\_\_\_\_
64. Ardor en los ojos \_\_\_\_\_
65. Garganta \_\_\_\_\_
66. Resfriado \_\_\_\_\_
67. Otros: \_\_\_\_\_
68. ¿Por qué cree que sufre esa enfermedad? \_\_\_\_\_
69. ¿Le molesta el humo del fogón? Sí \_\_\_\_\_ NO \_\_\_\_\_

70. ¿Le molesta el calor del fogón? Sí \_\_\_\_\_ NO \_\_\_\_\_
71. ¿Le gustaría tener un fogón que no produjera humo? Sí \_\_\_\_\_ No \_\_\_\_\_
72. ¿Por qué sí? \_\_\_\_\_
73. ¿Ya conoce la estufa o fogón LORENA? Sí \_\_\_\_\_ No \_\_\_\_\_
74. Si la respuesta es sí ¿dónde la ha visto? \_\_\_\_\_
75. ¿Usted estaría interesada en hacer una? Sí \_\_\_\_\_ No \_\_\_\_\_
76. Si no ¿por qué no? \_\_\_\_\_

**OBSERVACIONES** \_\_\_\_\_

---



---



---



---



---

**ANEXOS conversión unidades**

- ¿Cuántos kg una anega? \_\_\_\_\_
- ¿Cuántos kg son un cuarterón? \_\_\_\_\_
- ¿Cuántos kg son un litro? \_\_\_\_\_
- ¿Cuántos kg una docena de tortillas? \_\_\_\_\_

**OJO NO OLVIDAR:**

- ✓ Comprar y etiquetar tortillas
- ✓ Muestra y marcar mazorcas de maíz (Nombre Sra; Fecha; Lugar Milpa y # hectáreas sembrada) (OJO: cada bolsa con 2-3 mazorcas por milpa)
- ✓ Pesar las tortillas y la leña. (ver esta sección en FAO)
- ✓ REGISTRO FOTOGRÁFICO
- ✓ Dos preguntas adicionales:
  - ¿Quién decide qué variedades de maíz sembrar? \_\_\_\_\_
  - ¿Tiene clientes fijos? \_\_\_\_\_
