# Supplementary material
Source: publisher figshare collection journal article supplement (https://tandf.figshare.com/articles/dataset/_/7792436)

Handmade tortilla production in the basins of lakes Pátzcuaro and Zirahuén, Mexico

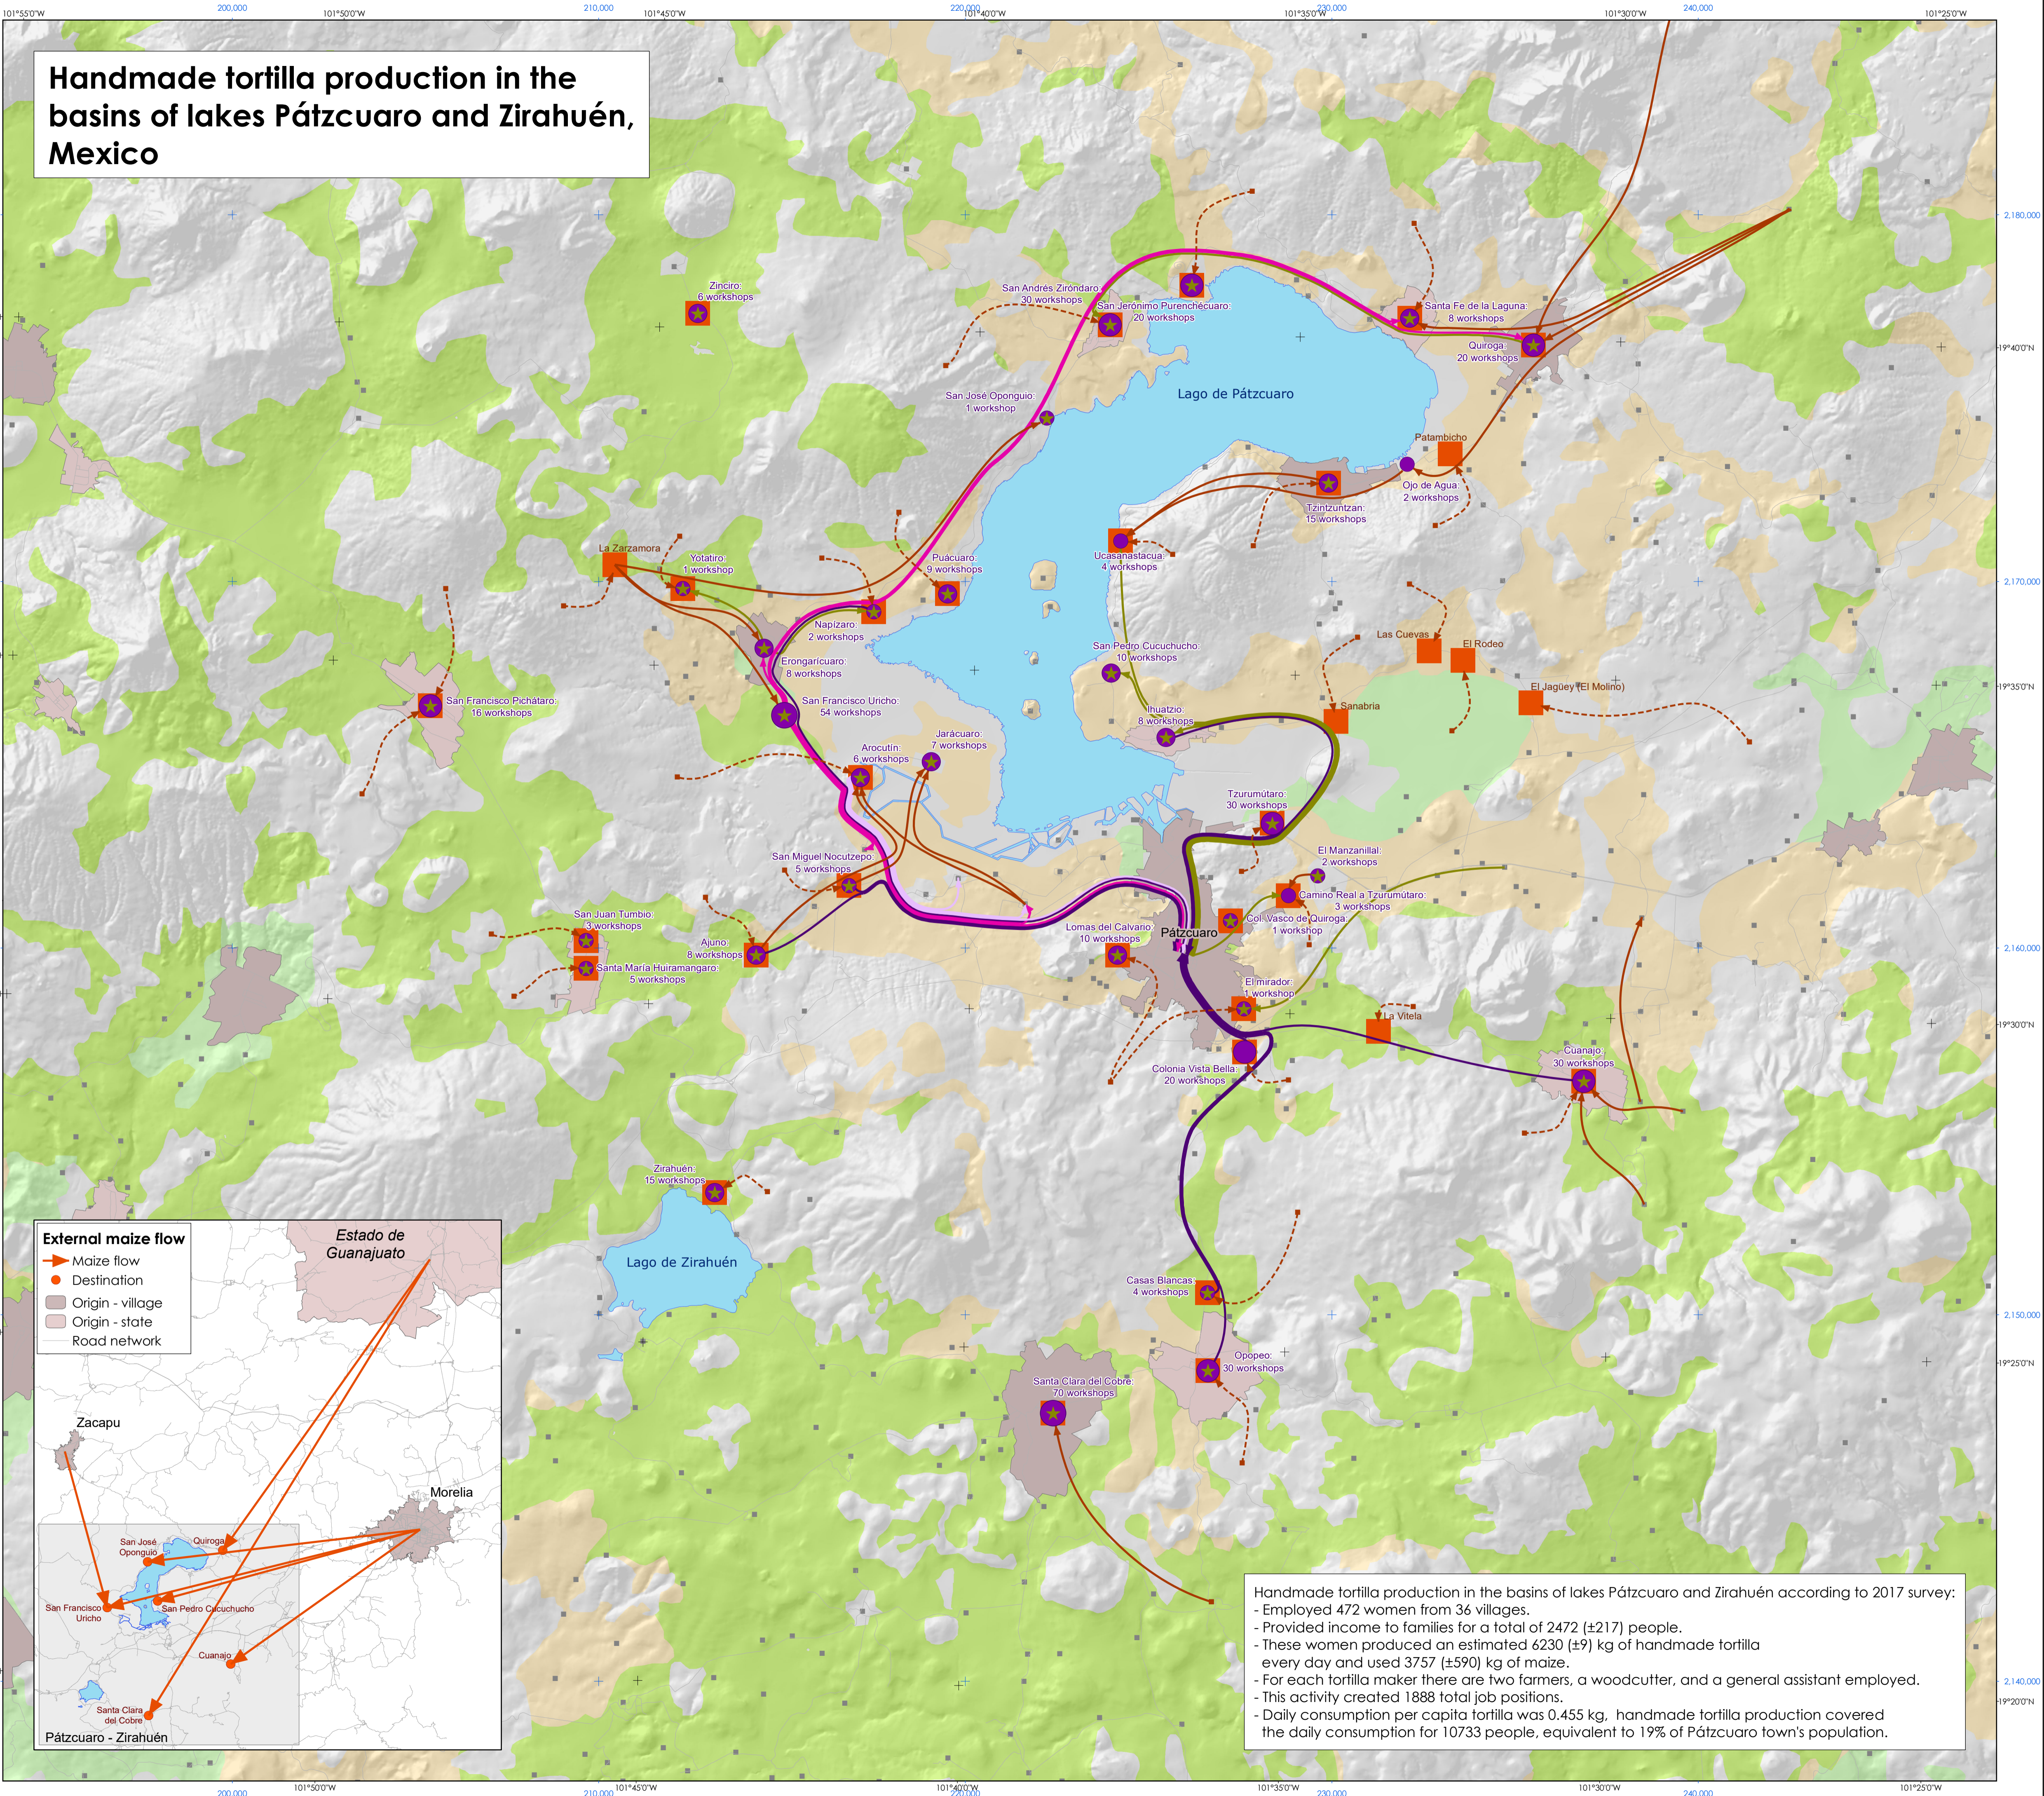

Number of handmade tortilla workshops

- 1 - 5
- 6 - 15
- 16 - 30
- 31 - 70

Handmade tortilla selling route

- To Pátzcuaro
- From Arocutín
- From Uricho

Maize source

- Same village
- Region

Fuelwood source

- Same village
- Same village
- Outside the village

Land use

- Irrigated agriculture
- Rainfed agriculture
- Rainfed – residual moisture agriculture
- Other landuse
- Lake
- Road network
- Small village
- Large village
- Town

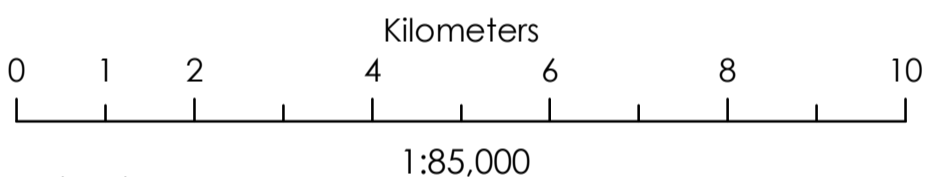

Projection: UTM  
Zone: 14N  
Ellipsoid: GRS80  
Datum: WGS84  
Coordinates in blue color are in meters

Sources:  
Results of 2017 survey  
INEGI: Marco geoestadístico 2014 versión 6.2 (DENUE)  
INEGI: Red Nacional de Caminos RNC, 2015  
Usos y tipo de vegetación - 1:250 000, INEGI Serie III, 2005  
Conjunto de datos vectoriales - 1:50 000, INEGI, 1999

Authors:  
Marta Astier Calderón, Quetzalcóatl Orozco Ramírez,  
Jorge Odenthal y Carmen Patricio Chávez

© Journal of Maps, 2018

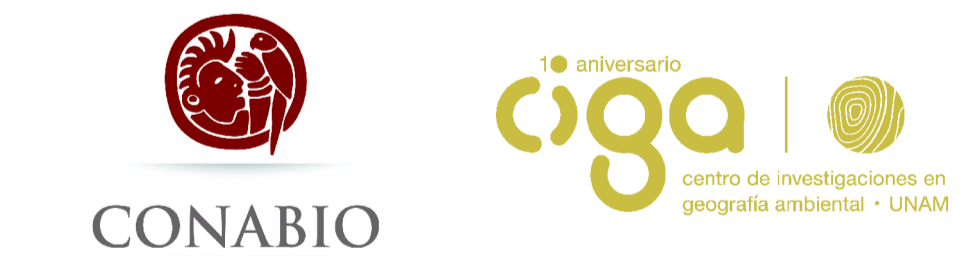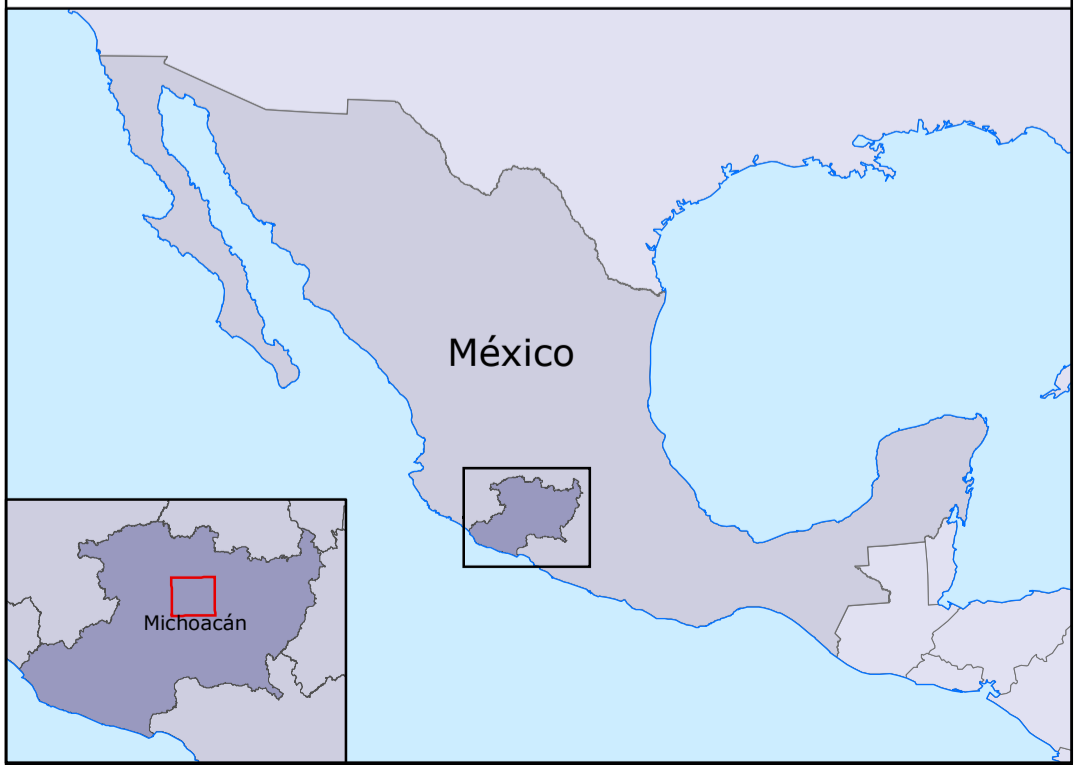

Supplement: Supplementary file 1 [file 2 › tjom_a_1576553_sm5868.pdf]
